# Supplementary material for: Screening of aflatoxin M1 in cows’ milk in Gadarif town, Sudan
Source: Research Square preprint supplement (doi:10.21203/rs.3.rs-999293/v1), 2021-10-28
Supplement: Supplementary file 1 [file 75e226700c1ef1e14f15caf8.xlsx]

## Sheet: ورقة1
	place	Reading	reselt
	1	1	1
	1	2	1
	1	1	1
	1	2	1
	1	1	1
	1	2	1
	1	1	0
	1	2	0
	1	1	0
	1	2	0
	1	1	1
	1	2	1
	1	1	1
	1	2	1
	1	1	0
	1	2	0
	1	1	0
	1	2	0
	1	1	1
	1	2	1
	1	1	1
	1	2	1
	1	1	0
	1	2	0
	1	1	0
	1	2	0
	1	1	0
	1	2	0
	1	1	0
	1	2	0
	1	1	0
	1	2	0
	1	1	1
	1	2	1
	1	1	0
	1	2	0
	1	1	0
	1	2	0
	1	1	1
	1	2	1
	1	1	0
	1	2	0
	1	1	0
	1	2	0
	1	1	0
	1	2	0
	1	1	1
	1	2	1
	1	1	0
	1	2	0
	1	1	0
	1	2	0
	1	1	0
	1	2	0
	1	1	0
	1	2	0
	1	1	1
	1	2	1
	1	1	1
	1	2	1
	1	1	#NULL!
	1	2	#NULL!
	1	1	#NULL!
	1	2	#NULL!
	1	1	#NULL!
	1	2	#NULL!
	1	1	#NULL!
	1	2	#NULL!
	1	1	1
	1	2	1
	1	1	0
	1	2	0
	1	1	0
	1	2	0
	2	1	1
	2	2	1
	2	1	0
	2	2	0
	2	1	0
	2	2	0
	2	1	0
	2	2	0
	2	1	0
	2	2	0
	2	1	0
	2	2	0
	2	1	0
	2	2	0
	2	1	0
	2	2	0
	2	1	0
	2	2	0
	2	1	0
	2	2	0
	2	1	0
	2	2	0
	2	1	0
	2	2	0
	2	1	0
	2	2	0
	2	1	0
	2	2	0
	2	1	0
	2	2	0
	2	1	0
	2	2	0
	2	1	#NULL!
	2	2	#NULL!
	2	1	#NULL!
	2	2	#NULL!
	2	1	#NULL!
	2	2	#NULL!
	2	1	#NULL!
	2	2	#NULL!
	2	1	#NULL!
	2	2	#NULL!
	2	1	#NULL!
	2	2	#NULL!
	2	1	#NULL!
	2	2	#NULL!
	2	1	#NULL!
	2	2	#NULL!
	2	1	#NULL!
	2	2	#NULL!
	2	1	#NULL!
	2	2	#NULL!
	2	1	#NULL!
	2	2	#NULL!
	2	1	#NULL!
	2	2	#NULL!
	2	1	#NULL!
	2	2	#NULL!
	2	1	#NULL!
	2	2	#NULL!
	3	1	1
	3	2	1
	3	1	1
	3	2	1
	3	1	0
	3	2	0
	3	1	0
	3	2	0
	3	1	0
	3	2	0
	3	1	0
	3	2	0
	3	1	0
	3	2	0
	3	1	0
	3	2	0
	3	1	0
	3	2	0
	3	1	0
	3	2	0
	3	1	0
	3	2	0
	3	1	0
	3	2	0
	3	1	1
	3	2	1
	3	1	0
	3	2	0
	3	1	1
	3	2	1
	3	1	1
	3	2	1
	3	1	0
	3	2	0
	3	1	0
	3	2	0
	3	1	0
	3	2	0
	3	1	0
	3	2	0
	3	1	#NULL!
	3	2	#NULL!
	3	1	1
	3	2	1
	3	1	1
	3	2	1
	3	1	0
	3	2	0
	3	1	0
	3	2	0
	3	1	0
	3	2	0
	3	1	0
	3	2	0
	3	1	#NULL!
	3	2	#NULL!
	3	1	0
	3	2	0
	3	1	0
	3	2	0
	3	1	0
	3	2	0
	3	1	0
	3	2	0
	3	1	0
	3	2	0
	3	1	0
	3	2	0
	3	1	1
	3	2	1
	3	1	0
	3	2	0
	3	1	0
	3	2	0
	3	1	1
	3	2	1
	3	1	1
	3	2	1
	3	1	0
	3	2	0

## Sheet: ورقة2
												reselt	place	Reading
												1	1	1
												1	1	2
												1	1	1
												1	1	2
												1	1	1
												1	1	2
												0	1	1
												0	1	2
												0	1	1
												0	1	2
												1	1	1
												1	1	2
												1	1	1
												1	1	2
												0	1	1
												0	1	2
												0	1	1
												0	1	2
												1	1	1
												1	1	2
												1	1	1
												1	1	2
												0	1	1
												0	1	2
												0	1	1
												0	1	2
												0	1	1
												0	1	2
												0	1	1
												0	1	2
												0	1	1
												0	1	2
												1	1	1
												1	1	2
												0	1	1
												0	1	2
												0	1	1
												0	1	2
												1	1	1
												1	1	2
												0	1	1
												0	1	2
												0	1	1
												0	1	2
												0	1	1
												0	1	2
												1	1	1
												1	1	2
												0	1	1
												0	1	2
												0	1	1
												0	1	2
												0	1	1
												0	1	2
												0	1	1
												0	1	2
												1	1	1
												1	1	2
												1	1	1
												1	1	2
												#NULL!	1	1
												#NULL!	1	2
												#NULL!	1	1
												#NULL!	1	2
												#NULL!	1	1
												#NULL!	1	2
												#NULL!	1	1
												#NULL!	1	2
												1	1	1
												1	1	2
												0	1	1
												0	1	2
												0	1	1
												0	1	2
												1	2	1
												1	2	2
												0	2	1
												0	2	2
												0	2	1
												0	2	2
												0	2	1
												0	2	2
												0	2	1
												0	2	2
												0	2	1
												0	2	2
												0	2	1
												0	2	2
												0	2	1
												0	2	2
												0	2	1
												0	2	2
												0	2	1
												0	2	2
												0	2	1
												0	2	2
												0	2	1
												0	2	2
												0	2	1
												0	2	2
												0	2	1
												0	2	2
												0	2	1
												0	2	2
												0	2	1
												0	2	2
												#NULL!	2	1
												#NULL!	2	2
												#NULL!	2	1
												#NULL!	2	2
												#NULL!	2	1
												#NULL!	2	2
												#NULL!	2	1
												#NULL!	2	2
												#NULL!	2	1
												#NULL!	2	2
												#NULL!	2	1
												#NULL!	2	2
												#NULL!	2	1
												#NULL!	2	2
												#NULL!	2	1
												#NULL!	2	2
												#NULL!	2	1
												#NULL!	2	2
												#NULL!	2	1
												#NULL!	2	2
												#NULL!	2	1
												#NULL!	2	2
												#NULL!	2	1
												#NULL!	2	2
												#NULL!	2	1
												#NULL!	2	2
												#NULL!	2	1
												#NULL!	2	2
												1	3	1
												1	3	2
												1	3	1
												1	3	2
												0	3	1
												0	3	2
												0	3	1
												0	3	2
												0	3	1
												0	3	2
												0	3	1
												0	3	2
												0	3	1
												0	3	2
												0	3	1
												0	3	2
												0	3	1
												0	3	2
												0	3	1
												0	3	2
												0	3	1
												0	3	2
												0	3	1
												0	3	2
												1	3	1
												1	3	2
												0	3	1
												0	3	2
												1	3	1
												1	3	2
												1	3	1
												1	3	2
												0	3	1
												0	3	2
												0	3	1
												0	3	2
												0	3	1
												0	3	2
												0	3	1
												0	3	2
												#NULL!	3	1
												#NULL!	3	2
												1	3	1
												1	3	2
												1	3	1
												1	3	2
												0	3	1
												0	3	2
												0	3	1
												0	3	2
												0	3	1
												0	3	2
												0	3	1
												0	3	2
												#NULL!	3	1
												#NULL!	3	2
												0	3	1
												0	3	2
												0	3	1
												0	3	2
												0	3	1
												0	3	2
												0	3	1
												0	3	2
												0	3	1
												0	3	2
												0	3	1
												0	3	2
												1	3	1
												1	3	2
												0	3	1
												0	3	2
												0	3	1
												0	3	2
												1	3	1
												1	3	2
												1	3	1
												1	3	2
												0	3	1
												0	3	2
